# Supplementary material
Source: publisher figshare collection journal article supplement (https://gsapubs.figshare.com/ndownloader/files/22412025)
Supplement: Supplementary file 1 [file 22412025]

Archive with 5 entries (5 files):
- Figure SM1_.pdf
- Figure SM2_.pdf
- SM1 Discussion, text.docx
- Table SM1.xlsx
- Table SM2.xlsx
