# Supplementary material
Source: publisher figshare collection journal article supplement (https://gsapubs.figshare.com/ndownloader/files/22412025)
Supplement: Supplementary file 1 [file 22412025 › Figure SM1_.pdf]

## type exposure

G - Knc5

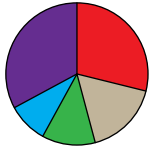

n=100

H - Knc5

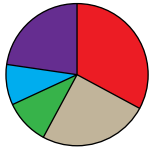

n=100

D - Knc3

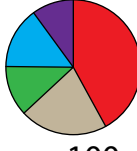

n=100

E - Knc3

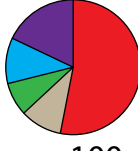

n=100

F - Knc3

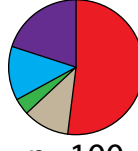

n=100

A - Knc1

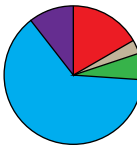

n=100

B - Knc1

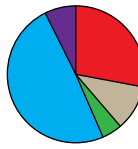

n=100

C - Knc1

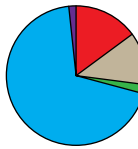

n=100

## Legend

clast count lithologies

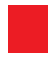

chert

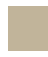

sandstone

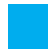

carbonate

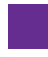

quartzite

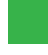

pebble conglomerate

Hildebrand exposure

## Hildebrand exposure

P - Knc2

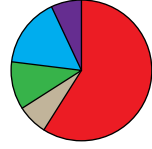

n=100

N - Knc1

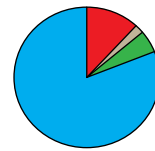

n=100

O - Knc1

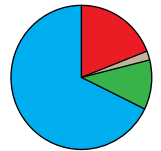

n=100

I - Knc1

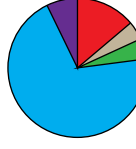

n=100

J - Knc1

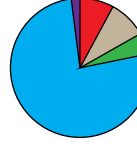

n=100

L - Knc1

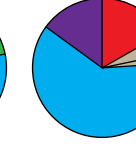

n=100

K - Knc2

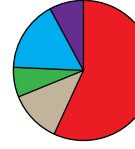

n=100

M - Knc2

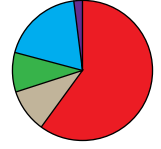

n=100
