# Supplementary material
Source: publisher figshare collection journal article supplement (https://gsapubs.figshare.com/ndownloader/files/22412025)
Supplement: Supplementary file 1 [file 22412025 › SM1 Discussion, text.docx]

**Supplementary Material for: Syn-contractional deposition of the Cretaceous Newark Canyon Formation, Diamond Mountains, Nevada: Implications for strain partitioning within the Western U.S. Cordillera**

**Table SM1:** Locations of U-Pb geochronology samples and conglomerate clast counts

**Figure SM1:** Supporting data for individual conglomerate clast counts

**Discussion SM1:** U-Pb geochronology methodology and supporting data

Zircons were separated from 2-4 kg samples of fine- to coarse-grained sandstone as well as sandstone matrix material from pebble-cobble conglomerate. Sample 1 is from the basal mudstone stratigraphically below the cobble-conglomerate in member Knc1 in the western Hildebrand exposure. Sample 2 was collected from the fine-to medium- sandstone matrix of the basal conglomerate of member Knc1 in the northeastern corner of the type exposure. Sample 3 was collected from a medium-grained cross-bedded sandstone interval within chert conglomerate of member Knc3 in the western type exposure. Sample 4 was collected from medium-grained sandstone of member Knc3 in the eastern Hildebrand exposure. Sample 5 is from a tuffaceous horizon collected within Knc4 in the type exposure. Sample 6 is from medium- to coarse-grained sandstone matrix of member Knc5 in the type exposure.

All samples were crushed to pea-gravel size using a jaw crusher and then to sand size using a disc mill. Milled samples were then separated by density using a Gemini water table, to remove grains that are less dense than zircon. Samples were then subjected to magnetic separation using a Free Fall Frantz magnetic separator, set at 0.2, 0.5, and 1.8 amps with a 10/20 tilt. The less magnetic fraction was further separated by methylene iodide. Zircon grains ranged in size (c-axis length) from ~30 to ~250 μm. To maintain a random zircon grain population for the detrital samples, separated zircons were poured onto double-sided tape. For the tuff sample (sample 5), euhedral grains were hand-picked from the separates. Zircon grains were mounted in cold epoxy, and the grains were polished once the epoxy was cured. Polished mounts were then carbon coated and cathodoluminescence images were taken in an effort to identify grain zonation and for mapping and grain layout purposes.

Analyses were performed at the Washington State University radiogenic isotope laboratory using a multi-collector-inductively coupled plasma-mass spectrometer (ICP-MS) with a New Wave 213 nm laser ablation system. Operating procedures and parameters discussed in Chang et al. (2006) were used. The laser was set for an 8 second warm up, a 16 second delay in effort to measure background levels, and a 46 second dwell period on each zircon grain. The laser was fired at 72-75% power and at a frequency of 10 Hz. Laser spot size and repetition rate were 30 nm and 10 Hz, respectively. He and Ar carrier gases delivered the sample aerosol to the plasma. Each analysis consisted of a short blank analysis followed by 250 sweeps through masses 204, 206, 207, 208, 232, 235, and 238, taking approximately 30 seconds. Time-independent fractionation was corrected by normalizing U-Pb and Pb/Pb ratios to zircon standards (Chang et al., 2006). For this study we used two zircon standards: Plesovice, with an age of ca. 338 Ma (Slama et al., 2008) and FC-1, with an age of ca. 1,099 Ma (Paces and Miller, 1993).

Three standards were analyzed per every 15 unknown zircon grains so that machine fluctuations could be accounted for. This method yields ages with a typical 1-2% error (2σ) (e.g., Chang et al., 2006; Gehrels et al., 2008). U-Th-Pb analyses utilize three decay systems: 238U→206Pb (half-life of 4.47 Ga), 235U→207Pb (half-life of 0.70 Ga), and 232Th→208Pb (half-life of 14.01 Ga) (Jaffey et al., 1971). These three decay systems offer chronometers founded on the measurement of 206Pb/238U, 207Pb/235U, and 208Pb/232U. Grains with visible inclusions and fractures were not analyzed in an effort to avoid potential compromised radiogenic isotope compositions (e.g., Pb-loss). Grains which yielded ages 900 Ma and older were allowed up to 15% positive discordance or 5% negative discordance in order to not be discarded, and grains that were younger than 900 Ma but older 300 Ma were allowed up to 20% positive discordance or 10% negative discordance. Because of the difficulty in calculating discordance for grains younger than 300 Ma, due to the linearity of the Concordia curve and the uncertainty of measurement of 207Pb (Bowring and Schmitz, 2003), we allowed 25% positive discordance or 20% negative discordance for grain ages <300 Ma. U-Pb ages and plots were calculated using Isoplot (Ludwig, 2008) and systematic and analytical errors (1σ) were included.

**Table SM2:** Supporting data for U-Pb zircon analyses (see attached Excel spreadsheet). See Table SM1 for a guide to sample numbers.

**Figure SM2:** Cathodoluminescence (CL) images ofzircon separated from sample 5 from Knc4, interpreted as a waterlain or reworked tuff.

**References Cited**

Bowring SA, Schmitz MD. 2003. High-precision U-Pb zircon geochronology and the stratigraphic record. See Hanchar & Hoskin 2003, pp. 305–26.

Chang Z., Vervoort J.D., McClelland W.C., and Knaack C., 2006, U–Pb dating of zircon by LA-ICP-MS. Geochemistry, Geophysics, Geosystems 7: Q05009.

Gehrels, G.E., Valencia V., Ruiz J., 2008, Enhanced precision, accuracy, efficiency, and spatial resolution of U-Pb ages by laser ablation–multicollector–inductively coupled plasma–mass spectrometry. Geochem. Geophys. Geosyst. 9: Q03017.

Jaffey A.H., Flynn K.F., Glendenin L.E., Bentley W.C., and Essling A.M., 1971, Precision measurement of half-lives and specific activities of 235U and 238U. Physical Review C4: 1889–1906.

Ludwig K.R. 1991, ISOPLOT–A plotting and regression program for radiogenic-isotope data. US Geological Survey Open-File Report, 91–445. Denver, CO: US Geological Survey.

Ludwig, K.R., 2008, User’s Manual for Isoplot 3.6: Geochronological Toolkit for Microsoft: Berkeley Geochronology Center Special Publication 4, 78 p.

Paces, J. B., and J. D. Miller Jr., 1993, Precise U-Pb ages of Duluth complex and related mafic intrusions, northeastern Minnesota: Geochronological insights to physical, petrogenetic, paleomagnetic, and tectonomagmatic processes associated with the 1.1 Ga midcontinent rift system, J. Geophys. Res., 98(B8), 13,997–14,014.

Slama J., Kosler J., Condon D.J., et al., 2008, Plesovice zircon – A new natural reference material for U–Pb and Hf isotopic microanalysis. Chemical Geology 249: 1–35.
