# Supplementary material
Source: publisher figshare collection journal article supplement (https://gsapubs.figshare.com/ndownloader/files/22412025)
Supplement: Supplementary file 1 [file 22412025 › Table SM1.xlsx]

## Sheet: Sheet1
	U-Pb Geochronology samples		NAD 27
	Sample ID in text	field ID	latitude	longitude	member
	Sample 1	HB008	39°37'35.0"	115°53'12.2"	Knc1
	Sample 2	TSN001	39°31'38.1"	115°51'16.6"	Knc1
	Sample 3	SDKNC3	39°30'27.9"	115°52'14.2"	Knc3
	Sample 4	HB005	39°36'49.0"	115°51'19.1"	Knc3
	Sample 5	SDKNC4IG	39°31'18.8"	115°52'08.7"	Knc4
	Sample 6	TSN002	39°31'37.3"	115°51'14.3"	Knc5
	Conglomerate Clast Count
	field site ID	latitude	longitude	member	exposure	n
	A	39°31'32.2"	115°51'14.2"	Knc1	type	100
	B	39°31'07.2"	115°51'12.5"	Knc1	type	100
	C	39°29'52.6"	115°50'48.8"	Knc1	type	100
	D	39°29'50.3"	115°51'03.5"	Knc3	type	100
	E	39°29'33.4"	115°51'52.3"	Knc3	type	100
	F	39°30'31.9"	115°52'17.2"	Knc3	type	100
	G	39°31'40.6"	115°51'31.3"	Knc5	type	100
	H	39°30'32.1"	115°51'28.9"	Knc5	type	100
	I	39°34'36.4"	115°53'03.8"	Knc1	Hildebrand	100
	J	39°35'13.8"	115°52'53.2"	Knc1	Hildebrand	100
	K	39°36'22.2"	115°52'20.4"	Knc2	Hildebrand	100
	L	39°36'42.5"	115°51'59.4"	Knc1	Hildebrand	100
	M	39°36'51.6"	115°52'01.8"	Knc2	Hildebrand	100
	N	39°37'31.9"	115°53'28.3"	Knc1	Hildebrand	100
	O	39°37'26.3"	115°53'43.7"	Knc1	Hildebrand	100
	P	39°37'36.8"	115°52'20.0"	Knc2	Hildebrand	100
