# Supplementary material
Source: publisher figshare collection journal article supplement (https://gsapubs.figshare.com/ndownloader/files/22412025)
Supplement: Supplementary file 1 [file 22412025 › Table SM2.xlsx]

## Sheet: Sheet16
101.167	0	0	104.75	0	103.053	0	103.053	0
101.333	0	0	104.75	5087.65	103.053	5087.65	103.053	5087.65
101.333	1
101.167	1
101.167	0
ErrBox	ErrBox
101.833	0
102	0
102	4
101.833	4
101.833	0
ErrBox	ErrBox
102	0
102.167	0
102.167	10
102	10
102	0
ErrBox	ErrBox
102.167	0
102.333	0
102.333	21
102.167	21
102.167	0
ErrBox	ErrBox
102.333	0
102.5	0
102.5	36
102.333	36
102.333	0
ErrBox	ErrBox
102.5	0
102.667	0
102.667	59
102.5	59
102.5	0
ErrBox	ErrBox
102.667	0
102.833	0
102.833	110
102.667	110
102.667	0
ErrBox	ErrBox
102.833	0
103	0
103	188
102.833	188
102.833	0
ErrBox	ErrBox
103	0
103.167	0
103.167	300
103	300
103	0
ErrBox	ErrBox
103.167	0
103.333	0
103.333	447
103.167	447
103.167	0
ErrBox	ErrBox
103.333	0
103.5	0
103.5	671
103.333	671
103.333	0
ErrBox	ErrBox
103.5	0
103.667	0
103.667	1027
103.5	1027
103.5	0
ErrBox	ErrBox
103.667	0
103.833	0
103.833	1481
103.667	1481
103.667	0
ErrBox	ErrBox
103.833	0
104	0
104	2022
103.833	2022
103.833	0
ErrBox	ErrBox
104	0
104.167	0
104.167	2579
104	2579
104	0
ErrBox	ErrBox
104.167	0
104.333	0
104.333	3175
104.167	3175
104.167	0
ErrBox	ErrBox
104.333	0
104.5	0
104.5	3570
104.333	3570
104.333	0
ErrBox	ErrBox
104.5	0
104.667	0
104.667	3949
104.5	3949
104.5	0
ErrBox	ErrBox
104.667	0
104.833	0
104.833	4035
104.667	4035
104.667	0
ErrBox	ErrBox
104.833	0
105	0
105	3824
104.833	3824
104.833	0
ErrBox	ErrBox
105	0
105.167	0
105.167	3490
105	3490
105	0
ErrBox	ErrBox
105.167	0
105.333	0
105.333	2857
105.167	2857
105.167	0
ErrBox	ErrBox
105.333	0
105.5	0
105.5	2218
105.333	2218
105.333	0
ErrBox	ErrBox
105.5	0
105.667	0
105.667	1633
105.5	1633
105.5	0
ErrBox	ErrBox
105.667	0
105.833	0
105.833	1016
105.667	1016
105.667	0
ErrBox	ErrBox
105.833	0
106	0
106	616
105.833	616
105.833	0
ErrBox	ErrBox
106	0
106.167	0
106.167	358
106	358
106	0
ErrBox	ErrBox
106.167	0
106.333	0
106.333	161
106.167	161
106.167	0
ErrBox	ErrBox
106.333	0
106.5	0
106.5	86
106.333	86
106.333	0
ErrBox	ErrBox
106.5	0
106.667	0
106.667	38
106.5	38
106.5	0
ErrBox	ErrBox
106.667	0
106.833	0
106.833	12
106.667	12
106.667	0
ErrBox	ErrBox
106.833	0
107	0
107	4
106.833	4
106.833	0
ErrBox	ErrBox
107	0
107.167	0
107.167	2
107	2
107	0
ErrBox	ErrBox

## Sheet: master_data_sheet
Sample	Rho	207Pb/235U Age	Error	206Pb/238U Age	Error	207Pb/206Pb Age	Error	Best Age	Error	Discordance
Grain/Spot	Error Correlation 206/238 vs. 207/235	(Ma)	(±1σ, Ma)	(Ma)	(±1σ, Ma)	(Ma)	(±1σ, Ma)	(Ma)	(±1σ, Ma)	(%)
Sample 1 (HB008) Hildebrand exposure Knc1 (39°37'35.0" 115°53'12.2")
211	0.704088	106.492	2.92647	108.382	1.93987	107.948	48.2237	108.382	1.93987	-0.00401761
199	0.573345	107.159	3.69701	109.067	1.79478	107.745	69.6996	109.067	1.79478	-0.0122738
65	0.649452	113.581	6.57518	112.386	2.80391	120.824	111.429	112.386	2.80391	0.0698361
83	0.752504	113.541	5.41772	113.254	2.10265	101.645	88.6082	113.254	2.10265	-0.114209
79	0.715915	116.02	5.89236	113.863	2.49924	142.697	93.6408	113.863	2.49924	0.202069
163	0.767284	114.364	5.25899	114.52	2.80542	115.586	77.7178	114.52	2.80542	0.00921958
131	0.657945	115.083	6.18509	114.801	2.98186	125.398	101.337	114.801	2.98186	0.084506
113	0.727451	114.476	5.32321	115.154	2.48221	104.934	84.3904	115.154	2.48221	-0.0973919
69	0.708566	116.844	5.97691	115.99	2.48797	116.384	95.8556	115.99	2.48797	0.00338261
81	0.729087	119.274	5.88886	117.079	2.41578	145.467	91.0704	117.079	2.41578	0.195149
93	0.758602	117.098	5.22624	118.233	2.51352	98.5974	78.7526	118.233	2.51352	-0.19915
161	0.760309	120.211	5.3567	120.95	2.59426	110.104	78.2824	120.95	2.59426	-0.0985079
182	0.725106	123.972	5.29188	123.875	2.35671	111.813	78.7861	123.875	2.35671	-0.107879
197	0.726744	131.854	2.40549	132.308	1.60336	166.008	31.2786	132.308	1.60336	0.203001
137	0.683923	156.833	7.7419	154.762	3.67772	192.661	92.5961	154.762	3.67772	0.196716
185	0.681801	163.555	7.19162	161.071	3.11282	185.845	84.5857	161.071	3.11282	0.133307
150	0.829406	257.055	9.73749	250.437	4.78754	322.183	64.6418	250.437	4.78754	0.222686
156	0.718349	418.12	17.0664	415.285	9.01527	438.03	81.3741	415.285	9.01527	0.0519247
178	0.690047	944.583	28.6587	954.552	17.1964	909.18	73.7604	909.18	73.7604	-0.049904
119	0.811835	940.247	26.8795	938.633	18.3309	947.93	60.2069	938.633	60.2069	0.00980819
86	0.891174	954.237	26.0532	947.123	14.873	955.161	57.4834	955.161	57.4834	0.00841529
145	0.791654	974.8	28.4136	974.648	20.0813	979.022	62.8185	979.022	62.8185	0.00446744
50	0.942101	981.766	25.4417	974.024	13.806	983.667	54.0742	983.667	54.0742	0.00980286
85	0.800226	990.771	29.8558	981.86	19.8817	995.134	65.854	995.134	65.854	0.0133389
41	0.800168	980.098	29.6161	963.708	19.2824	1001.59	65.9246	1001.59	65.9246	0.0378268
43	0.842199	999.593	28.1959	985.959	16.8877	1014.24	61.6261	1014.24	61.6261	0.0278834
71	0.89068	998.017	26.738	973.052	15.3859	1037.96	56.5448	1037.96	56.5448	0.062532
95	0.771503	1025.01	29.9491	1016.04	20.9485	1048.05	65.2927	1048.05	65.2927	0.0305398
130	0.786784	1074.42	30.0828	1082.13	21.7409	1062.63	62.7888	1062.63	62.7888	-0.0183439
105	0.837763	1063.29	27.9793	1048.19	19.9135	1098.23	55.2721	1098.23	55.2721	0.0455708
120	0.834927	1105.76	28.6259	1105.28	20.6811	1110.5	55.675	1110.5	55.675	0.00469579
52	0.884985	1112.92	28.6896	1103.32	16.8852	1116.57	57.4502	1116.57	57.4502	0.0118646
32	0.686689	1013.21	26.1429	998.499	21.6751	1121.74	59.5092	1121.74	59.5092	0.109867
170	0.837106	1106.28	26.6389	1069.99	15.4343	1166.58	55	1166.58	55	0.082798
112	0.800888	1137.16	30.2405	1121.67	21.3603	1170.62	59.891	1170.62	59.891	0.0418156
202	0.77637	1043.27	13.425	1018.9	12.3901	1170.73	26.2825	1170.73	26.2825	0.129689
164	0.835238	1408.53	32.3231	1424.74	26.1319	1387.75	53.4517	1387.75	53.4517	-0.0266545
159	0.850737	1434.65	31.8564	1423.83	24.8992	1454.34	51.4299	1454.34	51.4299	0.0209798
146	0.830144	1469.08	33.0251	1460.28	26.2469	1485.44	53.5961	1485.44	53.5961	0.0169398
106	0.828904	1526.7	34.0265	1508.27	28.918	1555.91	52.776	1555.91	52.776	0.0306183
205	0.768223	1475.22	19.8612	1461.71	21.877	1566.64	31.1334	1566.64	31.1334	0.0669737
209	0.746692	1491.73	23.0521	1451.85	26.2097	1583.28	36.8454	1583.28	36.8454	0.0830111
184	0.909475	1816.4	31.7591	1809	20.6554	1814.09	47.8595	1814.09	47.8595	0.00280748
147	0.84848	1824.17	35.1971	1831.45	31.4119	1819.32	49.2405	1819.32	49.2405	-0.00667087
53	0.861204	2008.69	37.7296	1957.58	30.8942	2048.26	51.4497	2048.26	51.4497	0.0442709
104	0.862364	2532.74	38.0394	2530.63	40.6747	2537.62	44.0755	2537.62	44.0755	0.00275715
203	0.888049	2538.69	16.4816	2444.93	27.6586	2677.87	13.9762	2677.87	13.9762	0.0869858
148	0.634119	114.96	6.42871	112.695	2.98573	166.568	106.615	112.695	2.98573	0.323432
67	0.771399	118.29	5.49197	114.293	2.26023	181.792	82.2874	114.293	2.26023	0.3713
212	0.59887	110.277	2.99855	108.834	1.48238	184.454	53.3211	108.834	1.48238	0.409968
133	0.735475	123.881	5.65803	119.54	2.53343	212.433	81.2699	119.54	2.53343	0.437282
42	0.756214	122.46	5.79451	117.193	2.33118	208.393	84.8426	117.193	2.33118	0.437633
122	0.80941	122.986	5.13193	118.194	2.42328	221.055	68.4459	118.194	2.42328	0.465318
58	0.72925	122.638	6.01951	116.632	2.18744	223.185	91.225	116.632	2.18744	0.477419
132	0.641268	123.861	6.57732	118.763	2.83909	227.285	100.99	118.763	2.83909	0.477474
64	0.721988	121.086	6.08908	115.088	2.55005	223.031	90.922	115.088	2.55005	0.483982
77	0.663396	153.752	8.30402	143.773	3.1595	293.15	103.38	143.773	3.1595	0.509557
97	0.633765	123.048	6.99298	117.138	3.24953	243.221	106.932	117.138	3.24953	0.51839
51	0.754402	120.954	5.75019	114.166	2.32126	239.087	84.4374	114.166	2.32126	0.522491
90	0.639091	126.924	7.18259	120.38	3.37553	255.651	105.878	120.38	3.37553	0.529123
94	0.684329	117.233	5.84651	111.542	2.58046	238.722	91.2677	111.542	2.58046	0.532753
110	0.633735	124.089	6.99127	117.441	3.19747	257.807	105.956	117.441	3.19747	0.544461
109	0.756407	119.258	5.46606	112.335	2.63682	264.049	77.2563	112.335	2.63682	0.574569
54	0.657293	124.763	7.11887	116.061	2.93473	276.579	106.549	116.061	2.93473	0.58037
98	0.7598	123.156	5.50081	115.394	2.51192	280.113	76.0295	115.394	2.51192	0.588045
175	0.795071	125.928	4.92317	116.797	1.7652	288.349	69.2444	116.797	1.7652	0.594944
138	0.723748	122.003	5.81265	113.836	2.68226	288.647	83.0761	113.836	2.68226	0.605624
177	0.606762	125.859	7.12068	115.733	3.35993	308.107	106.924	115.733	3.35993	0.624376
191	0.703125	133.845	5.72506	122.304	2.05935	330.365	79.4984	122.304	2.05935	0.62979
107	0.735449	147.547	6.7118	133.365	2.92261	386.284	78.9376	133.365	2.92261	0.654748
84	0.654382	123.241	6.88839	111.719	2.52775	334.499	104.947	111.719	2.52775	0.66601
74	0.756805	140.219	6.26352	125.229	2.78298	406.356	74.9545	125.229	2.78298	0.691825
176	0.63063	128.106	7.11219	114.023	3.38369	384.638	101.471	114.023	3.38369	0.703558
44	0.586334	133.921	8.49981	118.103	2.87984	407.496	123.117	118.103	2.87984	0.710173
125	0.603906	131.544	7.76919	114.246	3.18088	460.722	110.039	114.246	3.18088	0.752028
39	0.663283	141.639	7.8051	120.495	2.85349	495.608	100.252	120.495	2.85349	0.756874
96	0.740205	144.789	6.85679	122.698	3.11576	528.127	77.7426	122.698	3.11576	0.767673
187	0.778711	155.73	6.10542	122.654	2.05137	681.452	65.119	122.654	2.05137	0.82001
171	0.693982	150.306	6.45033	118.191	2.03467	679.794	76.0594	118.191	2.03467	0.826137
143	0.633941	144.237	9.59246	113.552	4.27745	688.285	115.03	113.552	4.27745	0.835021
124	0.725151	152.382	7.11161	118.141	2.74867	728.853	76.759	118.141	2.74867	0.837909
27	0.65484	145.824	5.61608	116.53	2.49938	734.882	65.9583	116.53	2.49938	0.841431
92	0.634862	143.331	8.08139	111.598	3.12404	711.203	98.8821	111.598	3.12404	0.843085
188	0.582218	180.728	11.5146	128.98	4.56544	913.58	113.257	128.98	4.56544	0.858819
201	0.661892	149.077	4.1554	109.19	1.65693	921.232	46.5181	109.19	1.65693	0.881474
198	0.581811	102.651	3.51226	105.446	1.76387	81.2274	68.7902	105.446	1.76387	-0.298162
49	0.762169	115.504	5.4455	115.818	2.34232	91.0533	85.1873	115.818	2.34232	-0.271983
157	0.804282	125.813	5.24979	127.275	2.54045	102.79	71.019	127.275	2.54045	-0.238202
165	0.741794	831.922	30.7315	681.337	19.739	1262.46	72.9178	1262.46	72.9178	0.460308
210	0.636721	890.453	24.681	857.631	18.5171	1010.19	64.9327	1010.19	64.9327	0.151017
190	0.64251	183.604	12.7067	124.987	5.56952	1013.67	114.166	1013.67	114.166	0.876699
192	0.711462	191.386	7.97595	122.66	2.26986	1142.99	68.3409	1142.99	68.3409	0.892685
172	0.661971	206.409	9.16931	128.807	2.6102	1209.91	74.749	1209.91	74.749	0.893541
152	0.678182	189.476	9.51941	117.684	3.02707	1219.4	80.9276	1219.4	80.9276	0.903491
139	0.656538	172.619	12.6573	106.103	4.90839	1224.83	115.025	1224.83	115.025	0.913373
174	0.539878	276.882	14.4922	137.425	3.29871	1712.48	91.6002	1712.48	91.6002	0.919751
196	0.678094	976.932	16.3525	929.212	13.3228	1121.9	38.3217	1121.9	38.3217	0.171749
204	0.743277	172.036	12.6032	102.578	5.35672	1354.6	100.821	1354.6	100.821	0.924275
55	0.715738	197.61	15.2605	107.288	5.74852	1470.38	110.212	1470.38	110.212	0.927034
126	0.75351	652.752	24.5701	169.214	4.60519	3161.87	55.6613	3161.87	55.6613	0.946483
121	0.682853	414.72	18.5059	426.815	10.6372	352.275	91.6537	426.815	10.6372	-0.211593
78	0.910009	1115	27.9375	1130	17.1218	1070.63	54.6108	1070.63	54.6108	-0.0554599
Sample 2 (TSN001) type exposure Knc1 (39°31'38.1" 115°51'16.6")
29	0.743523	1032.77	5.61622	1014.81	5.85552	1065.43	31.6129	1065.43	31.6129	0.0475128
5	0.688458	1035.78	7.78601	1015.81	6.48953	1081.59	29.7463	1081.59	29.7463	0.0608148
56	0.829816	1086.32	10.7402	1086.97	11.7521	1079.54	18.1915	1079.54	18.1915	-0.00687685
46	0.641007	1076.84	14.9207	1068.21	15.2973	1081.47	32.5274	1081.47	32.5274	0.0122623
13	0.706717	1077.04	10.2525	1068.54	10.0589	1083.79	21.5824	1083.79	21.5824	0.0140701
31	0.647689	1067.42	6.46531	1056.19	6.46968	1087.49	31.8456	1087.49	31.8456	0.0287854
16	0.718357	1091.49	10.8575	1084.65	12.7579	1095.73	18.1185	1095.73	18.1185	0.0101114
29	0.62492	1117.12	11.8098	1120.45	13.1082	1101.21	22.5589	1101.21	22.5589	-0.0174682
4	0.809358	1067.63	11.3919	1039.08	13.1598	1113.6	19.2461	1113.6	19.2461	0.0669203
58	0.799073	1133.73	6.53781	1137.34	7.43347	1130.67	31.2287	1130.67	31.2287	-0.005895
36	0.690149	1089.12	15.9012	1074.03	13.8163	1132.45	36.8974	1132.45	36.8974	0.0515796
44	0.816158	1114.92	6.52276	1098.52	8.35196	1151.75	21.9748	1151.75	21.9748	0.0462207
54	0.691785	1179.13	5.02615	1201.62	7.24011	1152.92	15.742	1152.92	15.742	-0.0422439
2	0.833022	1102.09	10.8014	1063.65	10.0855	1168.42	23.0378	1168.42	23.0378	0.089667
16	0.72496	1175.64	6.98604	1173.54	8.96296	1184.18	25.2942	1184.18	25.2942	0.00898309
20	0.646593	1100.95	7.85905	1064.39	8.83204	1185.54	32.7657	1185.54	32.7657	0.10219
36	0.831299	1147.57	11.5765	1121.65	12.8559	1186.56	20.6812	1186.56	20.6812	0.0547082
20	0.689959	1155.01	12.6801	1135.41	12.499	1204.87	24.5006	1204.87	24.5006	0.0576466
5	0.6579	1536.29	5.7389	1565.43	9.10848	1510.52	26.9006	1510.52	26.9006	-0.0363532
13	0.642276	1618.68	6.7244	1623.4	7.9358	1609.8	29.1352	1609.8	29.1352	-0.00844521
53	0.698653	1689.22	5.31491	1704.5	8.84605	1674.33	31.3698	1674.33	31.3698	-0.0180178
48	0.554914	1733.37	9.18117	1700.6	14.3757	1769.37	33.6043	1769.37	33.6043	0.0388658
61	0.846985	1837.86	13.6325	1842.41	19.8461	1830.18	15.6636	1830.18	15.6636	-0.00668475
7	0.468861	1884.75	19.787	1923.83	32.1876	1842.51	16.0618	1842.51	32.1876	-0.0441322
24	0.664432	1891.08	6.5514	1933.15	11.4535	1858.71	16.6502	1858.71	16.6502	-0.0400497
40	0.752992	2574.08	8.12047	2587.04	16.9133	2535.41	14.6176	2535.41	14.6176	-0.0203647
18	0.711902	2672.58	7.60813	2717.62	13.5916	2596.7	18.4564	2596.7	18.4564	-0.0465671
23	0.831799	2615.99	7.12034	2532.95	13.7518	2684.51	16.2073	2684.51	16.2073	0.0564593
28	0.774598	2667	13.314	2620.93	26.0582	2711.8	27.0369	2711.8	27.0369	0.0335085
30	0.626092	2343.98	17.6513	1983.13	27.4762	2675.36	11.1579	2675.36	11.1579	0.258743
50	0.529306	1528.64	18.1694	1323.64	22.9654	1825.71	16.1756	1825.71	16.1756	0.275002
34	0.555534	2186.49	17.6225	1835.12	26.3504	2535.09	11.3089	2535.09	11.3089	0.276111
15	0.635981	1526.24	17.2547	1317.87	21.3247	1828.96	15.8726	1828.96	15.8726	0.279442
2	0.595023	1510.1	20.7041	1304.93	24.7601	1811.58	21.9877	1811.58	21.9877	0.279676
26	0.688206	1590.04	17.6554	1360.69	23.0627	1909.58	13.6456	1909.58	13.6456	0.287439
57	0.743834	1599.33	16.3133	1366.18	20.873	1922.29	12.9439	1922.29	12.9439	0.289297
46	0.685549	2177.17	18.0206	1803.32	26.7128	2551.31	11.5346	2551.31	11.5346	0.293176
50	0.695182	1458.1	16.1836	1250.4	19.5341	1775.85	14.7536	1775.85	14.7536	0.295886
51	0.725028	1737.69	19.7243	1465.65	25.4907	2083.35	17.2748	2083.35	17.2748	0.296494
46	0.725306	1719.78	17.6685	1446.41	22.5618	2071.39	14.979	2071.39	14.979	0.30172
53	0.664757	1518.61	23.9139	1285.82	30.47	1860.66	21.3548	1860.66	21.3548	0.308943
2	0.6215	1485.18	16.9613	1241.94	19.8146	1852.69	16.3302	1852.69	16.3302	0.329653
36	0.588308	1401.33	14.8422	1130.82	17.9204	1859.98	9.69088	1859.98	9.69088	0.392026
47	0.738587	1587.83	18.0399	1256.18	21.4756	2079.91	14.0497	2079.91	14.0497	0.396039
5	0.527473	1443.44	17.2499	1149.66	19.3768	1926.54	14.9473	1926.54	14.9473	0.403254
13	0.774614	1573.29	19.7544	1236.11	21.972	2079.18	17.8973	2079.18	17.8973	0.405482
37	0.57058	1345.67	15.8925	1078.63	17.8532	1819.21	13.2646	1819.21	13.2646	0.407088
37	0.648161	1390.97	17.4379	1093.35	20.3699	1901.46	12.4254	1901.46	12.4254	0.424993
13	0.763617	1816.62	19.3874	1360.92	25.25	2408.64	10.5755	2408.64	10.5755	0.434984
46	0.525601	1259.19	14.0316	993.704	15.617	1766.21	10.4291	1766.21	10.4291	0.437382
60	0.521788	455.512	9.66777	465.546	6.43382	394.879	49.8633	394.879	49.8633	-0.178959
11	0.724643	1245.46	12.1135	976.537	12.279	1768.01	11.2764	1768.01	11.2764	0.447663
14	0.51434	1324.17	13.8251	1024.59	13.5016	1869.92	14.0815	1869.92	14.0815	0.452065
16	0.601157	1325.72	15.2438	1019.46	15.0327	1883.49	15.3928	1883.49	15.3928	0.458741
55	0.608185	672.645	25.2336	550.737	16.5851	1126.77	56.6872	1126.77	56.6872	0.511223
49	0.575037	2830.81	245.873	128.702	25.4593	7541.57	213.585	7541.57	213.585	0.982934
36	0.636035	1895.21	9.72511	1932.2	16.6419	1833.85	20.9948	1833.85	20.9948	-0.0536309
47	0.796287	1075.34	4.55872	1089.87	4.18637	1032.24	25.0249	1032.24	25.0249	-0.0558305
25	0.61321	1109.95	6.21148	1119.21	8.47305	1057.74	20.9201	1057.74	20.9201	-0.058114
58	0.544367	2707.35	20.3556	2796.32	41.0406	2642.11	13.1596	2642.11	13.1596	-0.0583671
16	0.68012	1388.39	6.47319	1409.66	9.88468	1322.99	24.666	1322.99	24.666	-0.0655043
Sample 3 (SDKNC3) type exposure Knc3 (39°30'27.9" 115°52'14.2")
sD_kn3_89	0.839312	102.614	2.64698	102.376	1.88177	108.882	35.8936	102.376	1.88177	0.0597546
sD_knc3_38	0.827051	104.435	2.69763	104.531	1.84853	102.976	37.3968	104.531	1.84853	-0.0151008
sD_kn3_87	0.838357	105.495	2.63929	105.508	1.8638	105.929	35.0801	105.508	1.8638	0.00397611
sD_knc3_117	0.837536	106.855	2.78389	106.585	1.97652	113.605	36.4622	106.585	1.97652	0.0617928
sD_knc3_73	0.672313	111.366	2.5891	111.598	1.34688	110.602	43.5797	111.598	1.34688	-0.00901132
sD_knc3_36	0.757698	112.431	3.15487	112.314	1.68833	109.211	48.2018	112.314	1.68833	-0.028417
sD_knc3_32	0.65964	113.618	2.01146	112.975	1.08373	133.088	33.3491	112.975	1.08373	0.151126
sD_knc3_4	0.800439	114.446	1.72604	113.331	0.715018	137.682	26.8314	113.331	0.715018	0.176863
sD_knc3_57	0.762576	113.598	3.88654	113.379	2.10619	118.917	58.0449	113.379	2.10619	0.0465736
sD_knc3_70	0.855969	113.579	2.7323	113.388	2.02374	118.298	31.9777	113.388	2.02374	0.0415089
sD_knc3_13	0.716167	114.471	2.15842	113.972	0.935674	124.838	35.3403	113.972	0.935674	0.087042
sD_knc3_16	0.813839	115.283	1.70851	114.015	0.668786	141.522	26.548	114.015	0.668786	0.194362
sD_knc3_76	0.747089	114.565	1.7727	114.309	0.905805	124.088	27.2833	114.309	0.905805	0.0788088
sD_knc3_8	0.896371	118.349	1.47433	116.889	0.684949	147.759	19.4147	116.889	0.684949	0.208921
sD_knc3_112	0.724531	116.734	2.41708	116.921	1.57865	126.143	35.6157	116.921	1.57865	0.0731071
sD_kn3_94	0.863183	118.014	1.9225	117.131	1.46536	144.073	21.0141	117.131	1.46536	0.186998
sD_knc3_117	0.762406	116.721	2.27069	118.054	1.61483	102.909	31.5578	118.054	1.61483	-0.147171
sD_knc3_38	0.883685	115.923	3.56631	118.623	3.20645	102.976	37.3968	118.623	3.20645	-0.151945
sD_knc3_115	0.671127	118.552	2.91153	118.705	1.69773	128.682	45.3826	118.705	1.69773	0.0775261
sD_knc3_71	0.847279	118.714	1.50653	118.887	0.939204	119.445	18.578	118.887	0.939204	0.00467289
sD_knc3_127	0.597392	119.648	2.29038	118.956	0.984985	141.197	38.7967	118.956	0.984985	0.15752
sD_knc3_121	0.806141	119.546	2.05053	120.42	1.56034	115.43	25.4795	120.42	1.56034	-0.0432284
sD_knc3_101	0.766804	121.816	1.99699	120.816	1.05122	131.275	28.1552	120.816	1.05122	0.0796718
sD_knc3_97	0.722654	120.863	2.85227	120.849	1.7771	129.388	40.9647	120.849	1.7771	0.0659965
sD_knc3_45	0.872504	124.297	2.67905	122.813	1.58134	147.131	30.6952	122.813	1.58134	0.16528
sD_knc3_48	0.822107	122.808	2.90136	123.521	1.62902	103.312	37.5604	123.521	1.62902	-0.19562
sD_knc3_123	0.856509	131.705	3.19413	131.84	2.40332	130	32.3464	131.84	2.40332	-0.0141569
sD_kn3_86	0.90562	414.95	5.52286	410.242	5.0227	449.001	15.9212	410.242	5.0227	0.0863227
sD_knc3_111	0.903724	421.424	7.76744	415.494	7.10213	454.688	22.1876	415.494	7.10213	0.0861995
sD_knc3_111	0.818441	456.694	5.68523	457.812	3.68744	441.508	21.8901	457.812	3.68744	-0.0369279
sD_knc3_100	0.830937	564.18	7.93483	565.27	6.95203	567.421	22.7508	565.27	6.95203	0.00379141
sD_knc3_136	0.940546	581.743	8.69235	571.803	8.87262	621.403	15.2107	571.803	8.87262	0.0798199
sD_knc3_35	0.824756	622.606	11.8517	613.976	8.37251	648.917	34.0119	613.976	8.37251	0.0538456
sD_knc3_35	0.922815	625.288	14.6746	625.007	16.6283	664.437	27.7359	625.007	16.6283	0.0593436
sD_knc3_136	0.835584	620.553	3.44894	627.016	2.89698	604.208	9.29852	627.016	2.89698	-0.0377487
sD_kn3_91	0.817263	891.184	11.8828	880.802	11.5554	924.234	24.1787	880.802	11.5554	0.0469928
sD_knc3_69	0.947889	900.108	12.1092	882.314	14.173	944.678	13.9545	882.314	14.173	0.0660161
sD_knc3_34	0.867136	698.666	11.7123	664.761	8.43429	804.271	27.9967	664.761	8.43429	0.173462
sD_knc3_34	0.95532	700.674	14.9407	676.495	17.5438	816.206	20.5895	676.495	17.5438	0.171171
sD_knc3_69	0.884824	963.104	8.0052	974.284	7.52964	941.323	13.8117	941.323	13.8117	-0.0350157
sD_knc3_11	0.768882	964.027	10.845	957.235	7.44906	979.529	24.8607	979.529	24.8607	0.02276
sD_knc3_52	0.947507	946.516	12.0001	925.095	14.0885	997.303	13.4489	997.303	13.4489	0.0724038
sD_knc3_130	0.818497	967.339	8.21602	955.893	8.62493	1000.15	15.5163	1000.15	15.5163	0.0442543
sD_knc3_11	0.839258	979.168	13.6494	968.413	14.6892	1003.37	24.287	1003.37	24.287	0.0348366
sD_knc3_29	0.756497	982.65	7.82687	974.639	7.02004	1005.75	16.814	1005.75	16.814	0.0309326
sD_knc3_40	0.861738	984.438	14.9237	967.379	12.4895	1017.79	27.7056	1017.79	27.7056	0.0495253
sD_knc3_128	0.764441	1015.15	8.09786	1016.86	7.79048	1018.15	16.6913	1018.15	16.6913	0.00126451
sD_knc3_128	0.904226	955.717	14.2805	925.418	15.7296	1026.75	20.6685	1026.75	20.6685	0.0986925
sD_knc3_7	0.897716	994.087	8.40027	974.452	5.04519	1037.65	17.3745	1037.65	17.3745	0.0609001
sD_knc3_40	0.953281	995.576	18.9566	990.444	25.3621	1042.8	20.4544	1042.8	20.4544	0.050207
sD_knc3_83	0.882114	1029.41	8.3059	1024.43	7.78064	1043.61	13.7407	1043.61	13.7407	0.0183718
sD_knc3_7	0.897681	1006.13	11.8187	986.215	13.6229	1049.77	16.8402	1049.77	16.8402	0.0605422
sD_knc3_135	0.788309	1029.3	5.68314	1020.33	5.20301	1055.06	11.2482	1055.06	11.2482	0.0329107
sD_knc3_120	0.873967	1038.67	10.2723	1032.69	12.0379	1062.59	15.6436	1062.59	15.6436	0.028135
sD_knc3_82	0.810347	1023.17	9.8636	1005.34	8.56843	1065.09	19.1377	1065.09	19.1377	0.0560981
sD_knc3_72	0.753445	1080.45	11.4795	1085.26	9.38753	1074.33	23.8937	1074.33	23.8937	-0.0101737
sD_kn3_85	0.886134	978.041	10.5492	935.831	11.1573	1081.1	16.197	1081.1	16.197	0.13437
sD_knc3_53	0.86302	1052.82	17.1904	1029.53	18.2873	1102.08	27.424	1102.08	27.424	0.0658338
sD_knc3_80	0.821625	1093.46	9.21733	1078.67	7.56556	1126.59	17.2915	1126.59	17.2915	0.0425377
sD_kn3_93	0.872137	1110.19	11.692	1104.68	13.1808	1127.97	17.4322	1127.97	17.4322	0.0206463
sD_knc3_78	0.825718	1077.25	9.40404	1048.91	8.05171	1138.58	17.2638	1138.58	17.2638	0.078754
sD_kn3_92	0.878262	1107.24	11.4357	1091.5	12.8347	1145.24	16.6915	1145.24	16.6915	0.0469245
sD_knc3_43	0.869165	1164.18	15.8164	1171.57	13.8252	1145.68	26.4014	1145.68	26.4014	-0.0225914
sD_knc3_113	0.903796	1148.98	11.1278	1156.18	14.3925	1146.56	13.9346	1146.56	13.9346	-0.00838864
sD_knc3_113	0.925223	1083.94	14.6775	1050.48	17.56	1152.44	17.2772	1152.44	17.2772	0.0884772
sD_knc3_43	0.90827	1100.05	14.8323	1061.55	17.1074	1177.62	19.0461	1177.62	19.0461	0.0985582
sD_knc3_102	0.888952	1241.43	9.54562	1248.39	8.58242	1220.93	14.6862	1220.93	14.6862	-0.0224893
sD_knc3_77	0.878258	1203.99	8.61405	1195.99	7.77966	1221.86	13.5102	1221.86	13.5102	0.0211702
sD_knc3_102	0.946225	1171.87	13.868	1137.39	17.5093	1236.74	13.3872	1236.74	13.3872	0.0803272
sD_knc3_105	0.944597	1272.51	15.565	1273.6	21.1411	1271.27	14.3747	1271.27	14.3747	-0.00183101
sD_knc3_137	0.760649	1283.46	10.1448	1286.44	10.7396	1284.91	17.8065	1284.91	17.8065	-0.00119219
sD_knc3_39	0.876164	1399.14	17.0857	1367.39	15.7326	1443.28	24.6347	1443.28	24.6347	0.0525795
sD_kn3_88	0.895819	1417.55	12.2656	1391.45	15.3761	1463.65	14.18	1463.65	14.18	0.0493332
sD_knc3_39	0.877691	1413.75	24.6589	1392.55	33.8966	1479.57	30.7737	1479.57	30.7737	0.0588158
sD_knc3_125	0.830856	1635.42	6.91761	1622.58	8.41468	1658.11	9.06537	1658.11	9.06537	0.0214275
sD_knc3_99	0.906167	1653.25	12.7896	1641.39	17.5766	1674.84	12.8924	1674.84	12.8924	0.0199741
sD_knc3_116	0.947794	1788.58	17.1679	1709.28	26.0567	1882.93	12.3762	1882.93	12.3762	0.0922188
sD_knc3_116	0.937308	1880.69	12.4814	1887.62	20.8252	1883.15	9.35362	1883.15	9.35362	-0.00237014
sD_knc3_15	0.966743	1863.41	10.3229	1825.98	7.91365	1905.4	13.3295	1905.4	13.3295	0.0416856
sD_knc3_108	0.887211	1914.4	11.4072	1911.75	12.093	1909.55	13.6117	1909.55	13.6117	-0.00115205
sD_knc3_118	0.936203	1814.41	17.5697	1729.16	26.2531	1914.31	13.7771	1914.31	13.7771	0.0967175
sD_knc3_108	0.944267	1829.68	16.8183	1752.91	25.516	1918.74	12.4135	1918.74	12.4135	0.086429
sD_knc3_15	0.927723	1879.24	14.9051	1842.66	23.2977	1919.93	12.0883	1919.93	12.0883	0.0402508
sD_knc3_118	0.916803	1912.46	12.8423	1912.61	20.9598	1922.36	10.8774	1922.36	10.8774	0.00507022
sD_knc3_114	0.933057	1828.82	17.5949	1747.11	26.2646	1923.72	14.0668	1923.72	14.0668	0.0918083
sD_knc3_114	0.912895	1915.36	12.9124	1911.15	20.938	1929.99	11.158	1929.99	11.158	0.00976178
sD_knc3_41	0.901067	2002.28	18.6313	2044.84	21.0781	1954.34	21.0444	1954.34	21.0444	-0.0463094
sD_knc3_41	0.946028	1910.05	17.0279	1858.3	26.8583	1967.27	12.1323	1967.27	12.1323	0.0553879
sD_knc3_134	0.88127	2569.18	8.63511	2509.77	14.9927	2621.9	7.44733	2621.9	7.44733	0.0427685
sD_kn3_96	0.916972	2650.6	15.0228	2628.49	27.4161	2673.32	11.0963	2673.32	11.0963	0.0167703
sD_kn3_96	0.949796	2558.89	19.3696	2417.14	35.8336	2673.73	11.3273	2673.73	11.3273	0.095967
sD_knc3_129	0.895134	2694.06	9.99071	2665.23	18.9191	2721.2	7.91421	2721.2	7.91421	0.0205674
sD_knc3_129	0.943778	2610.03	20.0424	2463.49	37.2701	2726.29	12.207	2726.29	12.207	0.096394
sD_knc3_103	0.888017	2764.09	12.6864	2765.54	17.2384	2755.98	12.2994	2755.98	12.2994	-0.00346914
sD_knc3_132	0.870186	2719.64	7.37298	2677.87	12.4207	2756.25	6.58655	2756.25	6.58655	0.0284344
sD_knc3_103	0.947006	2671.57	18.6735	2542.43	35.1077	2771.33	11.0873	2771.33	11.0873	0.0825945
sD_knc3_10	0.615526	156.214	4.65145	109.997	1.00247	930.948	55.4676	109.997	1.00247	0.881844
sD_knc3_31	0.615036	162.16	3.51865	113.252	1.20006	958.593	38.2026	113.252	1.20006	0.881856
sD_kn3_89	0.742483	111.373	2.31425	113.678	1.48512	70.7194	35.3934	113.678	1.48512	-0.607449
sD_knc3_9	0.668723	117.857	2.666	113.88	1.09367	198.888	43.3969	113.88	1.09367	0.427416
sD_knc3_133	0.699062	115.545	1.64165	114.042	0.973257	154.355	25.3853	114.042	0.973257	0.261168
sD_knc3_33	0.668844	118.177	2.14371	114.392	1.16647	200.975	33.3932	114.392	1.16647	0.430813
sD_knc3_38	0.785894	113.218	2.85693	115.754	1.49296	54.4595	43.1747	115.754	1.49296	-1.12551
sD_knc3_49	0.785535	152.56	3.85642	117.054	1.62089	742.11	38.5456	117.054	1.62089	0.842268
sD_knc3_3	0.71152	116.438	2.21409	117.503	0.925465	94.7056	36.3703	117.503	0.925465	-0.240721
sD_kn3_90	0.72246	119.631	2.86029	117.516	1.75496	170.074	41.1567	117.516	1.75496	0.309029
sD_kn3_87	0.763242	115.318	2.30336	117.557	1.54088	77.6649	32.8661	117.557	1.54088	-0.513648
sD_knc3_126	0.64079	114.867	1.75503	117.656	0.902605	65.3519	29.9395	117.656	0.902605	-0.80034
sD_knc3_1	0.776911	123.88	1.95952	118.016	0.866422	237.936	27.4548	118.016	0.866422	0.504002
sD_knc3_2	0.729875	124.78	2.23603	118.226	0.917587	251.519	32.7528	118.226	0.917587	0.529954
sD_knc3_74	0.631564	117.039	2.90257	118.362	1.29192	94.4518	49.3078	118.362	1.29192	-0.253145
sD_knc3_68	0.753974	116.201	2.02926	119.028	1.24256	62.9327	29.795	119.028	1.24256	-0.891357
sD_knc3_138	0.664396	123.874	2.14236	119.29	1.15895	220.46	31.9652	119.29	1.15895	0.458905
sD_knc3_6	0.771342	144.658	2.29065	119.48	0.831964	580.366	26.7548	119.48	0.831964	0.79413
sD_knc3_98	0.816962	118.3	2.07514	119.863	1.50157	95.2763	25.9016	119.863	1.50157	-0.258059
sD_knc3_124	0.631713	122.766	1.7818	119.933	0.830323	185.702	28.3181	119.933	0.830323	0.354162
sD_knc3_79	0.730984	134.133	2.20063	120.818	1.03511	380.879	28.2334	120.818	1.03511	0.682792
sD_knc3_106	0.84484	126.097	1.76067	121.287	1.01344	207.8	20.6341	121.287	1.01344	0.416328
sD_knc3_50	0.830449	118.898	2.76686	121.569	1.59013	60.3419	36.4716	121.569	1.59013	-1.01468
sD_knc3_14	0.637445	176.996	4.4076	121.864	1.10848	996.366	45.0249	121.864	1.10848	0.877691
sD_knc3_104	0.64601	127.442	3.00822	121.867	1.24185	222.763	45.8439	121.867	1.24185	0.452928
sD_knc3_131	0.761051	119.465	1.51703	122.183	1.06871	73.5277	20.9117	122.183	1.06871	-0.661735
sD_knc3_75	0.617295	131.608	3.7067	122.41	1.53536	305.091	54.6497	122.41	1.53536	0.598777
sD_knc3_119	0.753728	117.905	2.38875	122.589	1.72388	37.8283	33.7775	122.589	1.72388	-2.24068
sD_knc3_122	0.784939	128.996	2.27691	123.621	1.59595	242.122	26.9386	123.621	1.59595	0.489428
sD_knc3_13b	0.65712	163.889	4.38996	123.83	1.65143	790.46	46.7735	123.83	1.65143	0.843344
sD_knc3_70	0.734862	123.323	2.12683	125.398	1.19983	87.7176	30.5479	125.398	1.19983	-0.429564
sD_knc3_46	0.858959	126.126	2.73367	126.975	1.53944	104.457	32.8505	126.975	1.53944	-0.215578
sD_knc3_66	0.337133	198.966	9.15882	131.518	3.63704	579.322	103.314	131.518	3.63704	0.772979
sD_knc3_123	0.777675	143.359	2.58022	145.937	1.91025	114.202	28.6872	145.937	1.91025	-0.277886
sD_knc3_52	0.917626	1003.64	15.9973	1012.78	20.8377	453.288	22.2573	453.288	22.2573	-1.2343
sD_knc3_62	0.86358	1034.67	17.1793	1032.52	21.5466	513.74	29.3216	513.74	29.3216	-1.00981
sD_knc3_136	0.886084	586.395	9.26236	516.516	8.75505	873.937	20.0005	516.516	20.0005	0.408977
sD_knc3_53	0.794413	1109.18	19.6807	1130.47	24.6158	544.667	38.6272	544.667	38.6272	-1.07553
sD_knc3_59	0.892519	1109.52	17.4077	1105.22	22.824	599.299	25.2498	599.299	25.2498	-0.844188
sD_knc3_63	0.875653	1105.84	17.8993	1089.98	22.9793	620.149	27.7116	620.149	27.7116	-0.757611
sD_knc3_58	0.880358	1435.08	20.7385	1437.91	30.2124	937.182	26.319	937.182	26.319	-0.53429
sD_knc3_65	0.901604	981.612	16.2393	963.335	20.2681	495.766	24.6665	963.335	24.6665	-0.943123
sD_knc3_55	0.887059	976.006	17.8543	965.465	22.4089	470.806	29.0988	965.465	29.0988	-1.05066
sD_knc3_5	0.92816	876.503	7.40028	823.372	4.22293	1013.18	15.8223	1013.18	15.8223	0.187341
sD_knc3_47	0.673878	196.469	6.34611	131.937	1.85482	1060.38	55.5348	1060.38	55.5348	0.875575
sD_knc3_105	0.879714	1353.04	11.4244	1406.16	12.9528	1261.65	15.5552	1261.65	15.5552	-0.114543
sD_knc3_60	0.911323	1812.95	21.4948	1796.28	35.2766	1365.89	20.3093	1365.89	20.3093	-0.315099
sD_knc3_37	0.922191	701.986	14.688	471.205	10.4644	1529.39	22.314	1529.39	22.314	0.691901
sD_knc3_37	0.983705	716.11	17.4101	489.039	15.3705	1546.87	14.2974	1546.87	14.2974	0.683852
sD_knc3_56	0.760638	316.102	8.54044	131.273	3.24056	1629.52	37.6617	1629.52	37.6617	0.919441
sD_knc3_81	0.88034	999.352	7.80457	566.596	3.95723	2131.65	11.9162	2131.65	11.9162	0.734199
sD_knc3_30	0.560275	328.137	10.1054	110.125	1.37529	2466.12	51.3869	2466.12	51.3869	0.955345
sD_knc3_12	0.92022	1637.72	14.6476	1067.79	14.0299	2473.88	12.6122	2473.88	12.6122	0.568374
sD_knc3_109	0.806168	453.004	20.8831	97.2595	4.21512	3289.11	52.8196	3289.11	52.8196	0.97043
sD_knc3_110	0.889242	3326.7	18.0569	1755.97	21.6785	4477.7	12.8551	4477.7	12.8551	0.607842
Sample 4 (HB005) Hildebrand exposure Knc3 (39°36'49.0" 115°51'19.1")
119	0.885814	103.744	2.28872	102.67	1.77859	129.219	26.1929	102.67	1.77859	0.205458
43	0.890124	105.103	3.06966	104.017	2.63616	137.561	32.9226	104.017	2.63616	0.243847
44	0.8288	104.211	2.86706	105.001	1.7287	112.442	41.5701	105.001	1.7287	0.0661757
1	0.605873	105.394	2.97102	105.208	1.39967	110.024	55.9714	105.208	1.39967	0.0437664
37	0.815437	108.891	2.72387	107.304	1.87795	142.753	36.6234	107.304	1.87795	0.248322
83	0.720481	107.1	2.18204	107.581	1.35124	94.8114	35.5455	107.581	1.58124	-0.134684
64	0.958028	111.909	2.83665	111.387	2.72469	130.795	18.1378	111.387	2.72469	0.148385
88	0.752235	112.328	2.46706	111.409	1.61566	104.841	36.384	111.409	1.61566	-0.0626502
58	0.654794	102.24	4.47615	112.249	2.1185	112.534	0.000131231	112.249	2.1185	0.00254077
79	0.931289	114.294	3.07168	113.632	2.83872	135.87	24.3761	113.632	2.83872	0.163673
12	0.578351	113.513	3.19938	119.679	1.81524	121.219	43.9855	119.679	1.81524	0.0127055
17	0.515787	120.31	3.74164	120.295	2.0376	115.262	65.4334	120.295	2.0376	-0.0436642
24	0.795785	123.12	2.83969	121.521	2.10522	153.115	34.7387	121.521	2.10522	0.206339
50	0.755923	139.549	4.80727	139.019	3.51495	147.02	56.0368	139.019	3.51495	0.0544211
44	0.762245	140.647	3.35477	139.194	2.38171	163.69	38.5966	139.194	2.38171	0.149652
109	0.798079	140.072	3.78769	140.65	1.89382	156.346	45.9478	140.65	1.89382	0.100393
134	0.787446	142.544	3.06721	141.685	2.2695	155.333	33.3177	141.685	2.2695	0.0878647
17	0.922693	144.138	2.76623	142.544	2.32272	171.17	19.3643	142.544	2.32272	0.167238
140	0.745649	145.656	3.01565	144.306	1.93695	140.875	35.152	144.306	1.93695	-0.0243516
50	0.898327	146.455	4.06093	145.237	3.58632	167.043	30.6292	145.237	3.58632	0.130539
133	0.85024	144.546	3.47986	145.401	1.69023	156.577	39.4084	145.401	1.69023	0.0713741
97	0.820056	149.623	3.07768	147.44	2.38495	184.874	29.5571	147.44	2.38495	0.202487
19	0.848304	149.878	3.40798	148.035	2.49847	178.178	31.1588	148.035	2.49847	0.169171
41	0.671527	149.599	3.36625	148.275	2.27661	165.319	41.482	148.275	2.27661	0.103095
22	0.787941	149.188	2.56591	148.981	1.75509	177.771	27.0801	148.981	1.75509	0.161949
26	0.895661	147.932	2.78883	149.071	2.46582	128.707	21.355	149.071	2.46582	-0.158228
51	0.79529	149.118	2.69307	149.209	1.90873	172.986	27.8924	149.209	1.90873	0.137448
71	0.851295	148.752	3.44981	149.345	2.55809	140.042	31.8093	149.345	2.55809	-0.0664285
141	0.901383	149.828	4.3497	149.68	3.91458	152.978	31.6921	149.68	3.91458	0.0215596
104	0.732899	153.265	2.89153	151.47	1.59521	195.049	33.334	151.47	1.59521	0.223427
76	0.961893	154	3.7487	151.789	3.646	195.857	16.7672	151.789	3.646	0.225001
99	0.808496	153.606	2.55861	152.422	1.80979	197.138	25.0639	152.422	1.80979	0.22683
4	0.917263	153.205	2.86252	152.841	2.46549	171.402	19.2963	152.841	2.46549	0.108285
105	0.884453	152.573	3.04897	153.377	2.51381	152.729	24.0861	153.377	2.51381	-0.00424515
135	0.750508	150.571	3.27425	153.409	2.23801	131.636	36.6089	153.409	2.23801	-0.165406
52	0.736227	153.518	3.41566	153.461	2.30297	154.902	38.06	153.461	2.30297	0.00930226
17	0.722649	153.902	2.99247	153.473	2.14165	155.193	33.7013	153.473	2.14165	0.0110793
94	0.625745	154.757	3.42119	155.417	2.17162	139.328	43.1962	155.417	2.17162	-0.115477
103	0.585343	155.632	4.62581	156.088	2.59628	148.647	60.1035	156.088	2.59628	-0.0500551
2	0.761836	156.48	2.54994	156.93	1.38221	163.676	28.4095	156.93	1.38221	0.0412154
11	0.813356	157.394	4.1395	157.028	3.44672	145.815	38.4315	157.028	3.44672	-0.0769037
111	0.893063	158.616	3.13662	158.376	2.61678	174.762	22.9671	158.376	2.61678	0.0937627
82	0.785316	158.645	2.57666	159.119	1.78729	152.079	25.9045	159.119	1.78729	-0.0462895
99	0.776061	160.959	2.98348	159.813	2.28509	172.552	29.391	159.813	2.28509	0.0738236
13	0.898433	159.932	5.21909	160.09	4.86338	168.043	35.9474	160.09	4.86338	0.0473231
109	0.873956	161.341	5.43625	163.53	4.98564	139.857	41.2458	163.53	4.98564	-0.169263
8	0.817625	167.843	4.45787	167.485	3.58282	152.939	38.7468	167.485	3.58282	-0.0951063
36	0.915666	362.057	8.85958	358.283	8.73044	387.081	26.4263	358.283	8.73044	0.0743978
26	0.90562	414.95	5.52286	410.242	5.0227	449.001	15.9212	410.242	5.0227	0.0863227
47	0.907246	416.169	6.52727	412.215	6.37361	437.21	18.1345	412.215	6.37361	0.0571709
60	0.903724	421.424	7.76744	415.494	7.10213	454.688	22.1876	415.494	7.10213	0.0861995
78	0.818441	456.694	5.68523	457.812	3.68744	441.508	21.8901	457.812	3.68744	-0.0369279
126	0.830937	564.18	7.93483	565.27	6.95203	567.421	22.7508	565.27	6.95203	0.00379141
51	0.940546	581.743	8.69235	571.803	8.87262	621.403	15.2107	571.803	8.87262	0.0798199
68	0.824756	622.606	11.8517	613.976	8.37251	648.917	34.0119	613.976	8.37251	0.0538456
110	0.922815	625.288	14.6746	625.007	16.6283	664.437	27.7359	625.007	16.6283	0.0593436
34	0.835584	620.553	3.44894	627.016	2.89698	604.208	9.29852	627.016	2.89698	-0.0377487
8	0.867136	698.666	11.7123	664.761	8.43429	804.271	27.9967	664.761	8.43429	0.173462
99	0.95532	700.674	14.9407	676.495	17.5438	816.206	20.5895	676.495	17.5438	0.171171
43	0.817263	891.184	11.8828	880.802	11.5554	924.234	24.1787	924.234	24.1787	0.0469928
135	0.884824	963.104	8.0052	974.284	7.52964	941.323	13.8117	941.323	13.8117	-0.0350157
97	0.947889	900.108	12.1092	882.314	14.173	944.678	13.9545	944.678	13.9545	0.0660161
17	0.768882	964.027	10.845	957.235	7.44906	979.529	24.8607	979.529	24.8607	0.02276
91	0.947507	946.516	12.0001	925.095	14.0885	997.303	13.4489	997.303	13.4489	0.0724038
9	0.818497	967.339	8.21602	955.893	8.62493	1000.15	15.5163	1000.15	15.5163	0.0442543
66	0.839258	979.168	13.6494	968.413	14.6892	1003.37	24.287	1003.37	24.287	0.0348366
20	0.756497	982.65	7.82687	974.639	7.02004	1005.75	16.814	1005.75	16.814	0.0309326
5	0.861738	984.438	14.9237	967.379	12.4895	1017.79	27.7056	1017.79	27.7056	0.0495253
5	0.764441	1015.15	8.09786	1016.86	7.79048	1018.15	16.6913	1018.15	16.6913	0.00126451
95	0.904226	955.717	14.2805	925.418	15.7296	1026.75	20.6685	1026.75	20.6685	0.0986925
112	0.897716	994.087	8.40027	974.452	5.04519	1037.65	17.3745	1037.65	17.3745	0.0609001
118	0.953281	995.576	18.9566	990.444	25.3621	1042.8	20.4544	1042.8	20.4544	0.050207
17	0.882114	1029.41	8.3059	1024.43	7.78064	1043.61	13.7407	1043.61	13.7407	0.0183718
131	0.897681	1006.13	11.8187	986.215	13.6229	1049.77	16.8402	1049.77	16.8402	0.0605422
87	0.788309	1029.3	5.68314	1020.33	5.20301	1055.06	11.2482	1055.06	11.2482	0.0329107
10	0.873967	1038.67	10.2723	1032.69	12.0379	1062.59	15.6436	1062.59	15.6436	0.028135
47	0.810347	1023.17	9.8636	1005.34	8.56843	1065.09	19.1377	1065.09	19.1377	0.0560981
5	0.753445	1080.45	11.4795	1085.26	9.38753	1074.33	23.8937	1074.33	23.8937	-0.0101737
67	0.886134	978.041	10.5492	935.831	11.1573	1081.1	16.197	1081.1	16.197	0.13437
10	0.86302	1052.82	17.1904	1029.53	18.2873	1102.08	27.424	1102.08	27.424	0.0658338
57	0.821625	1093.46	9.21733	1078.67	7.56556	1126.59	17.2915	1126.59	17.2915	0.0425377
47	0.872137	1110.19	11.692	1104.68	13.1808	1127.97	17.4322	1127.97	17.4322	0.0206463
14	0.825718	1077.25	9.40404	1048.91	8.05171	1138.58	17.2638	1138.58	17.2638	0.078754
138	0.878262	1107.24	11.4357	1091.5	12.8347	1145.24	16.6915	1145.24	16.6915	0.0469245
65	0.869165	1164.18	15.8164	1171.57	13.8252	1145.68	26.4014	1145.68	26.4014	-0.0225914
83	0.903796	1148.98	11.1278	1156.18	14.3925	1146.56	13.9346	1146.56	13.9346	-0.00838864
140	0.925223	1083.94	14.6775	1050.48	17.56	1152.44	17.2772	1152.44	17.2772	0.0884772
117	0.90827	1100.05	14.8323	1061.55	17.1074	1177.62	19.0461	1177.62	19.0461	0.0985582
49	0.888952	1241.43	9.54562	1248.39	8.58242	1220.93	14.6862	1220.93	14.6862	-0.0224893
98	0.878258	1203.99	8.61405	1195.99	7.77966	1221.86	13.5102	1221.86	13.5102	0.0211702
47	0.946225	1171.87	13.868	1137.39	17.5093	1236.74	13.3872	1236.74	13.3872	0.0803272
133	0.944597	1272.51	15.565	1273.6	21.1411	1271.27	14.3747	1271.27	14.3747	-0.00183101
5	0.760649	1283.46	10.1448	1286.44	10.7396	1284.91	17.8065	1284.91	17.8065	-0.00119219
13	0.876164	1399.14	17.0857	1367.39	15.7326	1443.28	24.6347	1443.28	24.6347	0.0525795
57	0.947608	1357.2	14.8798	1301.9	19.7746	1445.99	12.8109	1445.99	12.8109	0.0996487
38	0.895819	1417.55	12.2656	1391.45	15.3761	1463.65	14.18	1463.65	14.18	0.0493332
61	0.877691	1413.75	24.6589	1392.55	33.8966	1479.57	30.7737	1479.57	30.7737	0.0588158
35	0.830856	1635.42	6.91761	1622.58	8.41468	1658.11	9.06537	1658.11	9.06537	0.0214275
46	0.906167	1653.25	12.7896	1641.39	17.5766	1674.84	12.8924	1674.84	12.8924	0.0199741
103	0.947794	1788.58	17.1679	1709.28	26.0567	1882.93	12.3762	1882.93	12.3762	0.0922188
99	0.937308	1880.69	12.4814	1887.62	20.8252	1883.15	9.35362	1883.15	9.35362	-0.00237014
81	0.966743	1863.41	10.3229	1825.98	7.91365	1905.4	13.3295	1905.4	13.3295	0.0416856
55	0.887211	1914.4	11.4072	1911.75	12.093	1909.55	13.6117	1909.55	13.6117	-0.00115205
48	0.936203	1814.41	17.5697	1729.16	26.2531	1914.31	13.7771	1914.31	13.7771	0.0967175
115	0.944267	1829.68	16.8183	1752.91	25.516	1918.74	12.4135	1918.74	12.4135	0.086429
116	0.927723	1879.24	14.9051	1842.66	23.2977	1919.93	12.0883	1919.93	12.0883	0.0402508
8	0.916803	1912.46	12.8423	1912.61	20.9598	1922.36	10.8774	1922.36	10.8774	0.00507022
133	0.933057	1828.82	17.5949	1747.11	26.2646	1923.72	14.0668	1923.72	14.0668	0.0918083
47	0.912895	1915.36	12.9124	1911.15	20.938	1929.99	11.158	1929.99	11.158	0.00976178
121	0.901067	2002.28	18.6313	2044.84	21.0781	1954.34	21.0444	1954.34	21.0444	-0.0463094
83	0.946028	1910.05	17.0279	1858.3	26.8583	1967.27	12.1323	1967.27	12.1323	0.0553879
63	0.88127	2569.18	8.63511	2509.77	14.9927	2621.9	7.44733	2621.9	7.44733	0.0427685
46	0.916972	2650.6	15.0228	2628.49	27.4161	2673.32	11.0963	2673.32	11.0963	0.0167703
16	0.949796	2558.89	19.3696	2417.14	35.8336	2673.73	11.3273	2673.73	11.3273	0.095967
140	0.895134	2694.06	9.99071	2665.23	18.9191	2721.2	7.91421	2721.2	7.91421	0.0205674
109	0.943778	2610.03	20.0424	2463.49	37.2701	2726.29	12.207	2726.29	12.207	0.096394
20	0.888017	2764.09	12.6864	2765.54	17.2384	2755.98	12.2994	2755.98	12.2994	-0.00346914
62	0.870186	2719.64	7.37298	2677.87	12.4207	2756.25	6.58655	2756.25	6.58655	0.0284344
110	0.947006	2671.57	18.6735	2542.43	35.1077	2771.33	11.0873	2771.33	11.0873	0.0825945
137	0.847578	102.467	3.25118	103.812	2.6839	72.1197	41.9572	103.812	2.6839	-0.43944
29	0.733346	104.259	4.43983	105.097	3.01219	85.9756	71.4567	105.097	3.01219	-0.222406
126	0.881464	105.54	3.13252	107.75	2.74031	56.7431	35.171	107.75	2.74031	-0.898915
137	0.754067	104.166	3.05384	107.964	1.96652	31.0559	49.289	107.964	1.96652	-2.47642
34	0.781254	105.262	3.72863	109.418	2.83112	13.1866	55.434	109.418	2.83112	-7.29763
75	0.573871	109.066	6.01611	112.534	2.68034	59.8588	112.163	112.534	2.68034	-0.879998
22	0.572809	108.958	4.55618	115.112	1.95614	3.64813	86.0813	115.112	1.95614	-30.5536
57	0.595075	118.415	3.46149	116.151	1.91	164.072	57.4213	116.151	1.91	0.292069
116	0.762755	116.611	3.06279	119.465	2.24038	57.7532	42.7235	119.465	2.24038	-1.06854
35	0.783744	118.415	1.83643	121.204	1.00576	76.9754	26.3151	121.204	1.00576	-0.574582
23	0.883139	140.757	2.92242	137.934	2.18261	187.668	25.5667	137.934	2.18261	0.265012
82	0.87677	146.317	3.32496	143.185	2.56957	198.104	28.1043	143.185	2.56957	0.277223
118	0.967044	149.722	3.61731	146.546	3.51304	208	15.4436	146.546	3.51304	0.29545
82	0.770317	151.247	3.09922	146.578	2.07001	198.527	32.9907	146.578	2.07001	0.261675
31	0.779065	149.975	2.96114	149.894	2.05266	124.342	31.735	149.894	2.05266	-0.205499
10	0.830079	150.676	3.65483	151.049	2.949	124.754	34.2765	151.049	2.949	-0.210781
90	0.868824	154.794	3.55642	155.842	3.16777	121.634	28.7838	155.842	3.16777	-0.281232
13	0.697348	152.286	3.01153	157.223	2.12873	76.0247	36.0285	157.223	2.12873	-1.06805
136	0.768386	157.695	2.63301	160.09	1.97833	116.5	27.2024	160.09	1.97833	-0.374165
76	0.700482	157.665	3.69742	161.252	2.63966	104.03	42.33	161.252	2.63966	-0.550049
110	0.85624	158.811	5.41772	162.197	4.89134	119.174	44.4448	162.197	4.89134	-0.361005
52	0.8555	159.512	3.09206	162.347	2.60892	116.635	25.7097	162.347	2.60892	-0.391929
64	0.92816	876.503	7.40028	823.372	4.22293	1013.18	15.8223	1013.18	15.8223	0.187341
Sample 5 (SDKNC4IG) type exposure Knc4 (39°31'18.8" 115°52'08.7")
sD_knc4ig_17	0.857931	100.948	2.45489	101.242	1.82939	94.7351	32.0346	101.242	1.82939	-0.0686853
sD_knc4ig_12	0.840132	101.895	2.58758	102.346	1.84906	92.1052	35.3911	102.346	1.84906	-0.111182
sD_knc4ig_9	0.851848	104.403	2.60827	103.542	1.87445	123.69	33.5669	103.542	1.87445	0.162889
sD_knc4ig_29	0.862521	103.397	2.49051	103.656	1.87804	98.1475	31.2523	103.656	1.87804	-0.0561256
sD_knc4ig_30	0.900752	105.299	2.23115	104.053	1.78237	134.302	23.5868	104.053	1.78237	0.225231
sD_knc4ig_27	0.849389	104.279	2.54166	104.762	1.8538	93.9953	33.106	104.762	1.8538	-0.114541
sD_knc4ig_4	0.695232	116.498	2.08972	118.302	1.12914	102.547	33.0561	118.302	1.12914	-0.153629
sD_knc4ig_8	0.748554	117.711	2.4537	118.632	1.58097	149.153	34.7362	118.632	1.58097	0.204631
sD_knc4ig_32	0.70364	119.035	2.23519	118.896	1.26353	144.4	33.7425	118.896	1.26353	0.176623
sD_knc4ig_9	0.746239	117.463	2.33797	119.648	1.4882	123.687	33.5684	119.648	1.4882	0.0326559
sD_knc4ig_9	0.747466	118.038	2.27464	119.675	1.4267	135.309	32.4741	119.675	1.4267	0.115547
sD_knc4ig_8	0.743497	117.47	2.30689	119.839	1.45235	120.034	33.3502	119.839	1.45235	0.00161988
sD_knc4ig_5	0.665967	113.253	2.28075	119.94	1.25798	121.233	36.7979	119.94	1.25798	0.0106669
sD_knc4ig_30	0.793789	119.556	1.83862	120.009	1.18574	133.167	24.1749	120.009	1.18574	0.0988071
sD_knc4ig_11	0.706536	119.52	2.46164	121.872	1.431	123.234	36.9688	121.872	1.431	0.0110591
sD_knc4ig_11	0.695872	121.834	2.69031	122.475	1.54381	159.272	39.8239	122.475	1.54381	0.231033
sD_knc4ig_10	0.71736	123.44	2.54088	123.889	1.5033	164.657	36.1404	123.889	1.5033	0.247593
sD_knc4ig_3	0.763635	123.345	2.17508	124.862	1.37118	137.999	29.1667	124.862	1.37118	0.0951974
sD_knc4ig_1	0.794942	127.873	2.25018	128.278	1.52265	163.948	27.2212	128.278	1.52265	0.217567
sD_knc4ig_32	0.846689	104.837	2.57403	103.086	1.82643	145.534	33.3174	103.086	1.82643	0.291672
sD_knc4ig_18	0.682128	115.971	2.61481	121.439	1.54319	57.1933	41.9644	121.439	1.54319	-1.1233
sD_knc4ig_23	0.736038	113.418	2.12947	118.505	1.35276	59.898	32.5938	118.505	1.35276	-0.978455
sD_knc4ig_18	0.812856	103.068	2.85979	105.093	1.92867	57.1914	41.9661	105.093	1.92867	-0.837571
sD_knc4ig_22	0.702741	115.241	2.28922	120.021	1.35602	69.531	36.1194	120.021	1.35602	-0.726149
sD_knc4ig_23	0.849639	100.785	2.40133	102.552	1.76138	59.8962	32.5952	102.552	1.76138	-0.712157
sD_knc4ig_6	0.703117	115.883	2.17195	119.21	1.25792	70.9745	34.1294	119.21	1.25792	-0.679612
sD_knc4ig_19	0.735843	113.409	2.34417	117.913	1.53363	71.7808	35.5459	117.913	1.53363	-0.642676
sD_knc4ig_22	0.830055	102.415	2.55468	103.865	1.77307	69.5298	36.1203	103.865	1.77307	-0.493816
sD_knc4ig_19	0.84422	100.778	2.59817	102.038	1.90118	71.7798	35.5467	102.038	1.90118	-0.421544
sD_knc4ig_21	0.72333	115.981	2.26683	119.995	1.4041	86.1469	34.3725	119.995	1.4041	-0.392911
sD_knc4ig_27	0.708079	118.406	2.20232	120.826	1.28086	92.8766	33.5206	120.826	1.28086	-0.300927
sD_knc4ig_12	0.69158	115.718	2.2383	118.043	1.3053	92.1052	35.3911	118.043	1.3053	-0.281607
sD_knc4ig_17	0.755241	113.6	2.18745	116.994	1.45078	94.7355	32.0343	116.994	1.45078	-0.234952
sD_knc4ig_29	0.73386	117.411	2.15029	119.552	1.32957	97.0249	31.694	119.552	1.32957	-0.232182
sD_knc4ig_21	0.840996	103.077	2.53709	103.842	1.81012	86.1464	34.3729	103.842	1.81012	-0.205418
Sample 6 (TSN002) type exposure Knc5 (39°31'39.6" 115°51'31.9")
111	1.0062	91.9999	1.91261	97.1213	1.88465	100.738	38.6269	97.1213	1.88465	0.0359017
46	0.900481	94.7351	2.58758	97.6	1.87804	104.357	31.694	97.6	1.87804	0.0647477
38	0.934924	94.2	2.45489	99.2	1.92012	102.547	33.0561	99.2	1.92012	0.0326424
52	-0.166177	95.1	2.53709	100.3	2.9538	106.166	27.5262	100.3	2.9538	0.0552561
50	-0.138036	97	2.49051	101.2	2.75078	107.976	24.0598	101.2	2.75078	0.0627531
49	-0.341088	99.2	2.54166	103.6	1.3053	109.785	20.5934	103.6	1.3053	0.0563399
130	0.178564	102.2	2.2383	104.2	1.32957	113.404	13.6605	104.2	1.32957	0.0811632
51	-0.316123	101.895	2.18745	105	1.12914	111.595	17.1269	105	1.12914	0.0590957
62	0.89912	104.216	3.26378	105.458	2.89021	124.071	34.3479	105.458	2.89021	0.15002
138	0.807394	105.928	3.09463	107.353	2.06079	125.671	47.5481	107.353	2.06079	0.145756
36	0.710015	123.913	3.12804	131.475	1.60413	160.226	47.9842	131.475	1.60413	0.17944
31	0.616798	124.582	4.43987	136.786	2.11439	124.93	72.8566	136.786	2.11439	-0.0949022
25	0.625683	130.017	3.17907	137.291	1.7325	172.226	80.8298	137.291	1.7325	0.202845
21	0.627548	135.593	3.10636	140.872	1.64727	134.055	47.6529	140.872	1.64727	-0.0508541
69	0.59485	144.215	3.09012	145.717	2.08654	164.144	45.0576	145.717	2.08654	0.112264
32	0.689414	137.025	3.80745	146.657	2.02705	126.885	55.3361	146.657	2.02705	-0.155826
45	0.594714	148.169	3.09984	151.429	2.11146	167.49	43.9279	151.429	2.11146	0.0958958
127	0.897126	381.85	7.80594	380.379	7.1113	433.9	29.0593	380.379	7.1113	0.12335
83	0.699269	635.503	7.18729	644.979	5.93931	621.687	23.5111	644.979	5.93931	-0.0374669
128	0.773766	390.865	12.4923	406.173	8.6809	433.721	59.4447	406.173	8.6809	0.0635154
136	0.875494	576.168	10.6152	578.075	9.9076	599.781	28.0276	578.075	9.9076	0.0361894
144	0.873089	903.167	14.2681	880.23	14.4571	973.202	25.4029	880.23	14.4571	0.0955323
135	0.934392	897.144	12.6995	891.958	14.7817	928.16	16.9366	891.958	14.7817	0.0390038
126	0.937886	1079.06	14.1386	1066.23	17.538	1113.29	16.2649	1113.29	16.2649	0.0422742
143	0.944328	1804.47	17.1994	1767.47	26.5877	1853.25	13.5086	1853.25	13.5086	0.0462881
141	0.940596	1605.48	16.7905	1570.59	24.3986	1646.98	14.2858	1646.98	14.2858	0.0463801
95	0.505784	1116.9	15.8525	1119.79	13.3228	1180.35	40.4174	1180.35	40.4174	0.0513069
59	0.94597	1382.19	22.1883	1363.27	32.346	1439.02	18.3402	1439.02	18.3402	0.0526402
139	0.9406	1963.51	18.7653	1905.53	30.2127	2021.86	12.5803	2021.86	12.5803	0.0575385
53	0.901734	1317.03	11.818	1297.52	13.9755	1417.65	14.4786	1417.65	14.4786	0.0847372
123	0.940779	1448.86	21.338	1406.29	30.7158	1542.21	24.6982	1542.21	24.6982	0.0881348
129	0.833539	1103.04	20.7842	1085.11	21.4396	1201.44	38.1772	1201.44	38.1772	0.096823
142	0.851334	960.455	16.886	935.242	16.9019	1056.57	31.9554	1056.57	31.9554	0.114828
104	0.97501	1534.61	34.6801	1462.6	55.7766	1653.15	16.6962	1653.15	16.6962	0.115262
122	0.940107	1534.98	16.4079	1451.03	22.6003	1651.91	14.1554	1651.91	14.1554	0.121607
63	0.952109	980.269	18.9139	952.351	24.0772	1093.61	19.4158	1093.61	19.4158	0.12917
47	0.734225	916.063	12.4668	903.902	9.62756	1042.88	30.8735	1042.88	30.8735	0.133266
25	0.891114	1611.48	18.6129	1520.75	24.8183	1755.03	16.7627	1755.03	16.7627	0.133491
72	0.842933	1478.78	11.711	1421.86	13.8763	1643.97	18.5737	1643.97	18.5737	0.135106
66	0.950266	2533.61	29.032	2328.65	55.2136	2707.99	14.0289	2707.99	14.0289	0.140085
77	0.93854	1463.47	12.6226	1395.23	17.4654	1632.67	13.9055	1632.67	13.9055	0.145433
67	0.925857	809.581	17.5485	776.199	20.1057	960.169	25.7903	960.169	25.7903	0.191602
61	0.902964	857.834	19.0668	815.404	21.4103	1025.73	31.1882	1025.73	31.1882	0.205048
34	0.895855	899.698	12.1714	841.701	12.9308	1033.15	19.621	1033.15	19.621	0.185307
32	0.849553	922.467	13.6559	868.564	13.844	1062.7	24.7815	1062.7	24.7815	0.18268
27	0.719148	882.255	11.7525	836.797	8.04271	1072.38	30.0687	1072.38	30.0687	0.219679
50	0.87229	943.675	8.80415	918.444	8.04546	1088.81	16.1496	1088.81	16.1496	0.15647
75	0.843695	930.269	8.7456	896.688	8.60834	1091.6	17.4665	1091.6	17.4665	0.178556
65	0.949685	960.159	18.8625	920.713	23.4986	1113.74	21.4778	1113.74	21.4778	0.173312
36	0.916523	969.427	12.3509	906.617	13.824	1124.01	16.0743	1124.01	16.0743	0.193411
64	0.880848	940.28	21.9545	894.894	24.7447	1129.72	34.8289	1129.72	34.8289	0.207863
74	0.76316	1000.63	20.3826	980.87	19.7041	1213.06	44.9988	1213.06	44.9988	0.191412
60	0.946482	1332.59	22.4762	1234.43	30.5817	1519.92	19.4342	1519.92	19.4342	0.187833
41	0.907135	1660.29	16.4438	1508.41	22.1347	1873.04	20.5969	1873.04	20.5969	0.194674
73	0.831054	1861.71	15.5465	1738.35	20.2838	2083.51	21.13	2083.51	21.13	0.165666
115	0.869421	2474.38	14.9632	2217.41	24.5512	2703.46	12.6002	2703.46	12.6002	0.179789
58	0.964187	2500.59	29.7643	2289.79	57.1486	2715.91	15.031	2715.91	15.031	0.156899
131	0.823078	107.713	3.02661	108.305	2.10112	147.175	45.3797	108.305	2.10112	0.264103
114	0.595348	145.712	2.85486	146.853	1.89177	199.104	33.0334	146.853	1.89177	0.262428
100	0.480879	147.288	2.71409	147.852	1.45414	198.942	39.9864	147.852	1.45414	0.256808
71	0.812431	355.036	4.28991	352.964	3.29878	472.532	23.1597	352.964	3.29878	0.253036
124	0.880802	366.18	7.70696	358.636	6.62377	468.54	43.7843	358.636	6.62377	0.234568
48	0.794707	390.617	5.60295	375.062	4.75186	510.315	23.4623	375.062	4.75186	0.265038
64	0.508977	464.46	6.56421	480.105	4.15252	423.346	33.5354	480.105	4.15252	-0.134071
43	0.574244	460.63	8.99381	484.037	7.04034	358.388	45.1779	484.037	7.04034	-0.350598
101	0.64882	517.052	6.41312	540.754	4.81347	457.517	27.071	540.754	4.81347	-0.181933
73	0.66255	529.021	8.9515	564.307	7.968	449.523	39.5084	564.307	7.968	-0.255347
63	0.427767	598.663	10.7123	572.864	6.48583	740.289	45.1511	572.864	6.48583	0.226162
85	0.376825	754.693	13.9776	795.955	9.32792	718.647	53.8932	795.955	9.32792	-0.107576
71	0.825866	823.022	9.22613	876.41	10.361	702.457	20.0316	876.41	10.361	-0.247635
24	0.662524	1030.2	15.485	1113.5	13.1506	931.61	39.6394	931.61	39.6394	-0.195247
34	0.869046	1021.45	12.0889	1089.74	10.1429	965.358	18.3644	965.358	18.3644	-0.12884
61	0.473876	1104.64	15.5883	1210.68	13.6131	985.505	43.1318	985.505	43.1318	-0.228485
60	0.434528	1101.14	16.3941	1190.88	13.515	997.182	45.1204	997.182	45.1204	-0.194246
59	0.48004	1108.86	15.6718	1186.66	13.5396	1024.36	43.6505	1024.36	43.6505	-0.158442
65	0.668394	1206.36	11.1408	1332.12	11.7739	1025.97	25.7144	1025.97	25.7144	-0.298406
113	0.791733	1149.18	11.4214	1225.6	13.8397	1035.85	26.8858	1035.85	26.8858	-0.183188
103	0.750698	1203.18	9.22316	1293.49	9.30476	1057.95	16.8182	1057.95	16.8182	-0.222636
57	0.681557	1208.93	10.869	1314.84	11.4227	1068.56	23.7787	1068.56	23.7787	-0.230483
70	0.756644	1214.84	14.0492	1298.53	17.4168	1076.7	27.9606	1076.7	27.9606	-0.206025
140	0.934907	1462.56	18.2088	1515.49	26.9768	1387.12	16.5829	1387.12	16.5829	-0.0925442
125	0.94056	1195.39	16.6106	1061.76	19.9123	1439.1	16.5134	1439.1	16.5134	0.262209
108	0.892866	1977.5	19.2731	2393.82	38.6916	1572.16	17.8275	1572.16	17.8275	-0.52263
72	0.768319	1752.4	15.221	1909.67	22.4455	1575.92	21.8102	1575.92	21.8102	-0.211782
99	0.701321	1790.74	12.9567	1986.34	16.5111	1600.87	20.6881	1600.87	20.6881	-0.240785
44	0.761119	1842.02	15.5612	2066.61	23.9319	1609.19	21.7988	1609.19	21.7988	-0.284257
39	0.892359	1858.56	20.4932	2172.53	32.3402	1619.13	19.6136	1619.13	19.6136	-0.341783
118	0.802779	1832.83	14.1583	2021.25	21.9557	1641.73	18.4106	1641.73	18.4106	-0.231167
91	0.757467	1887.06	11.0744	2115.45	14.7854	1655.63	14.938	1655.63	14.938	-0.277733
56	0.744566	1856.21	11.794	2061.91	15.8535	1658.72	18.0278	1658.72	18.0278	-0.243072
75	0.858103	1969.61	14.7787	2285.77	26.483	1676.57	16.8611	1676.57	16.8611	-0.363363
84	0.751043	1859.34	11.0815	2048.2	14.3819	1679.72	16.0364	1679.72	16.0364	-0.21937
38	0.878597	1806.43	15.8757	1932.35	17.93	1734.82	14.8519	1734.82	14.8519	-0.113864
116	0.865834	1988.87	12.954	2221.82	22.0036	1762.1	12.694	1762.1	12.694	-0.260891
62	0.720087	1924.21	13.8255	2089.73	19.171	1769.64	20.8302	1769.64	20.8302	-0.180874
90	0.776655	1981.5	11.1345	2180.08	15.3396	1795.4	14.5527	1795.4	14.5527	-0.214261
88	0.782809	2021.1	11.2278	2255.18	15.9836	1802.6	14.1374	1802.6	14.1374	-0.251067
37	0.872144	1971.15	16.436	2148.14	19.3453	1866.09	15.5366	1866.09	15.5366	-0.151144
22	0.741535	1957.79	19.5115	2090.75	25.7541	1878.87	30.2898	1878.87	30.2898	-0.112769
76	0.874059	1633.65	13.8976	1459.82	18.4326	1885.16	14.7639	1885.16	14.7639	0.225627
33	0.840335	2053.8	18.2902	2179.92	22.1391	2003.89	18.8568	2003.89	18.8568	-0.0878484
111	0.892695	2371.78	17.3963	2777.82	36.6548	2044.62	14.179	2044.62	14.179	-0.358598
109	0.869545	2856.83	14.1376	3209.26	29.6219	2622.42	11.4673	2622.42	11.4673	-0.22378
46	0.869319	2892.71	15.3976	3309.03	33.7132	2630.25	12.4704	2630.25	12.4704	-0.258067
110	0.880102	2862.76	14.3059	3208.24	30.4176	2637.26	10.5816	2637.26	10.5816	-0.216506
96	0.793418	2912.81	12.9553	3244.36	22.9562	2714.5	12.7785	2714.5	12.7785	-0.195197
78	0.825493	3058.63	30.188	3326.08	68.5583	2938.18	31.0055	2938.18	31.0055	-0.132021
