# Supplementary material
Source: publisher figshare collection journal article supplement (https://gsapubs.figshare.com/ndownloader/files/22412025)

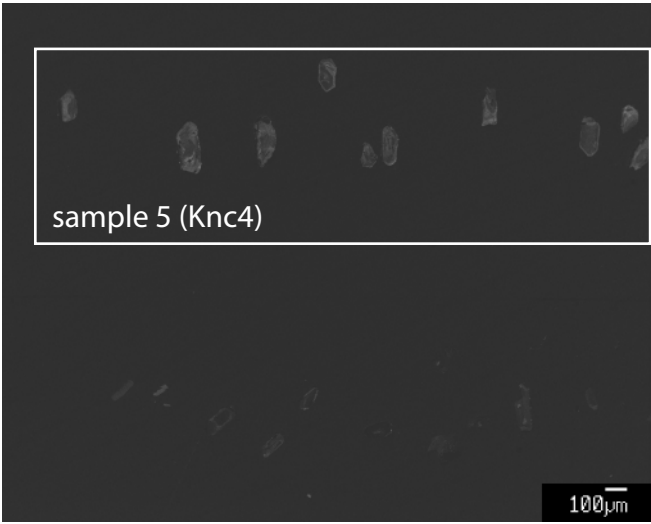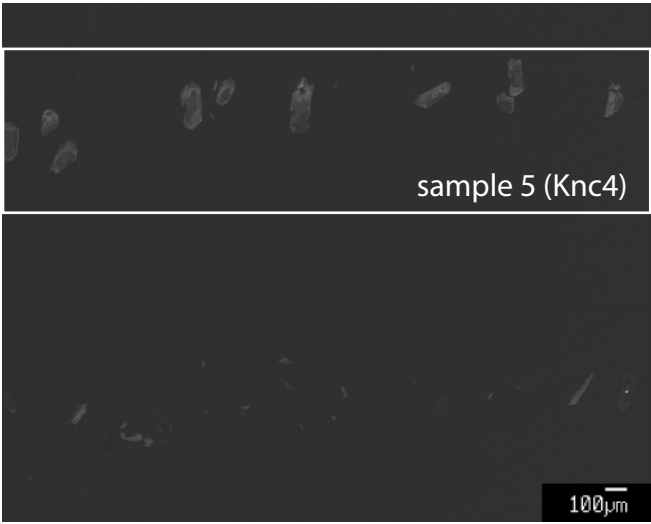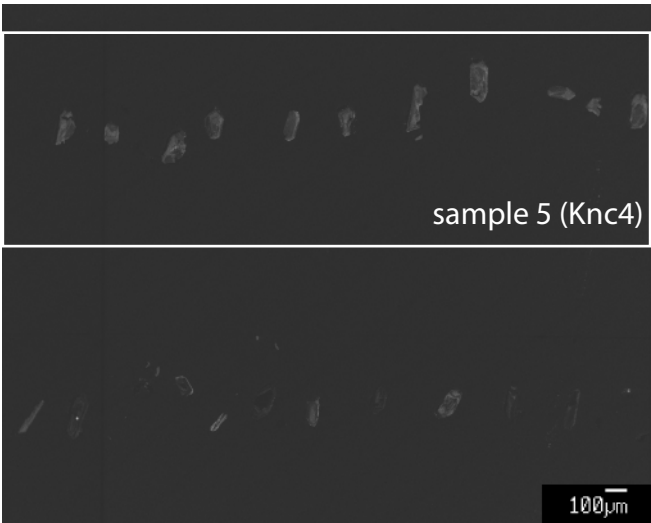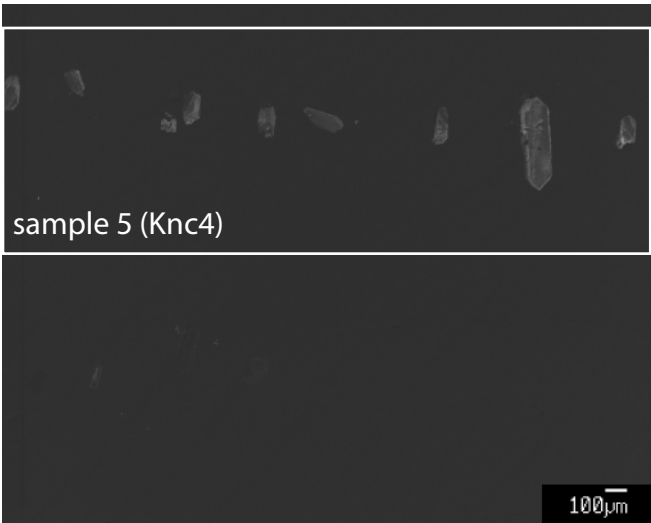

Supplement: Supplementary file 1 [file 22412025 › Figure SM2_.pdf]
